# Supplementary material for: Adhesion glycoprotein CD44 functions as an upstream regulator of a network connecting ERK, AKT and Hippo-YAP pathways in cancer progression
Source: PubMed Central journal article supplement (PMC4413630; doi:10.18632/oncotarget.3095), 2014-12-30
Supplement: oncotarget-06-2951-s001.pdf [file oncotarget-06-2951-s001.pdf]

## Adhesion glycoprotein CD44 functions as an upstream regulator of a network connecting ERK, AKT and Hippo-YAP pathways in cancer progression

### Supplementary Material

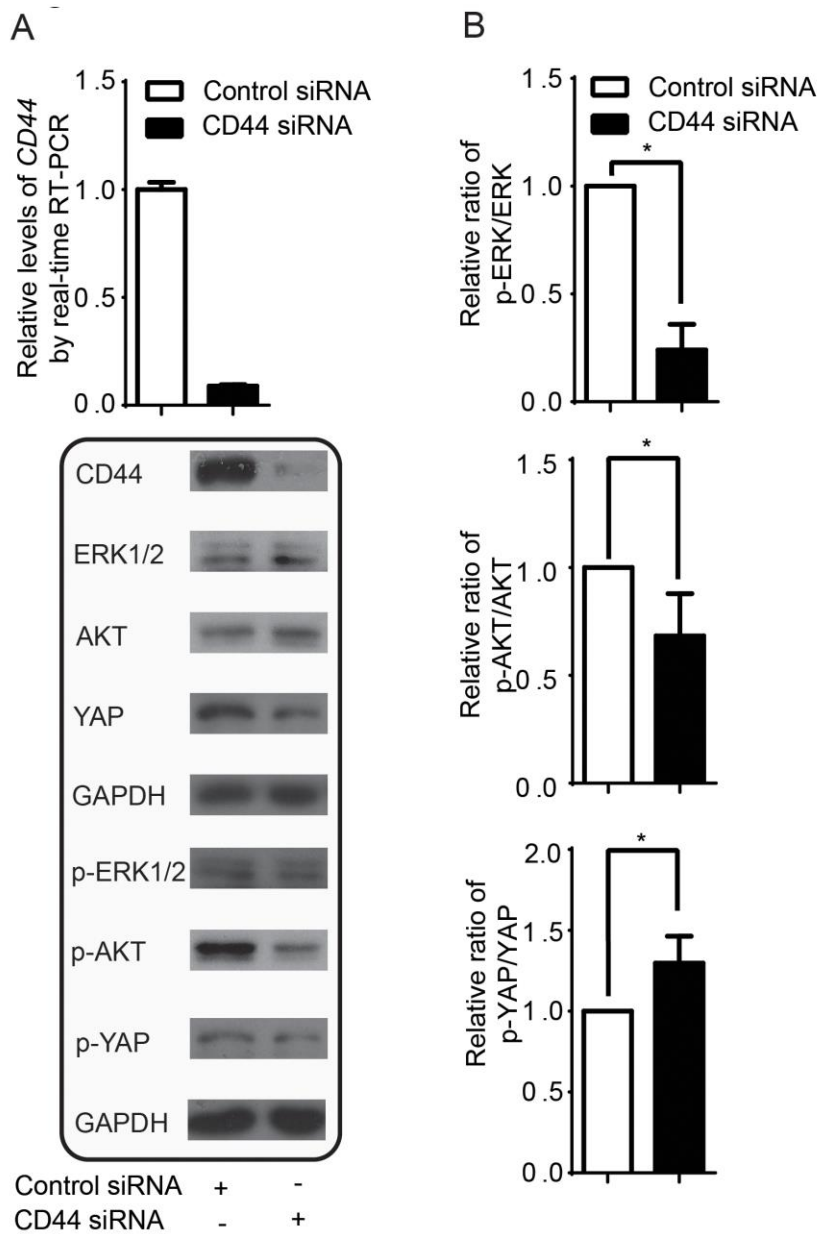

**Figure S1:** CD44 functions as an upstream regulator of AKT, ERK and Hippo-yap in

BT549. \*  $p < 0.05$

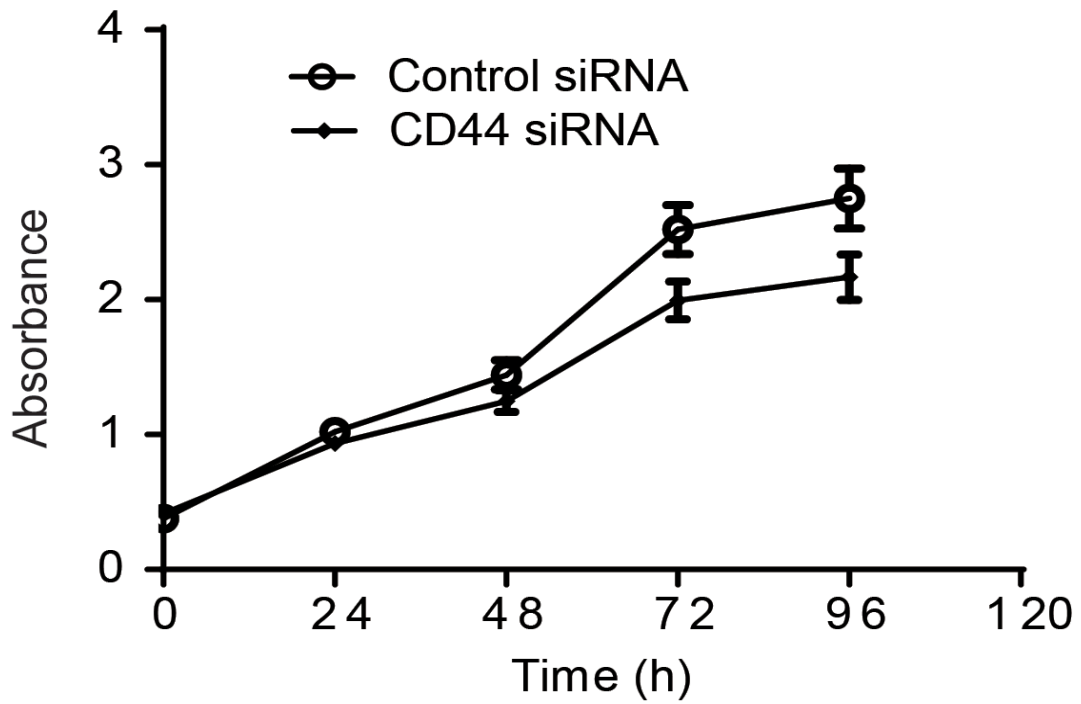

**Figure S2:** Silencing CD44 decreased the proliferation of BT549.

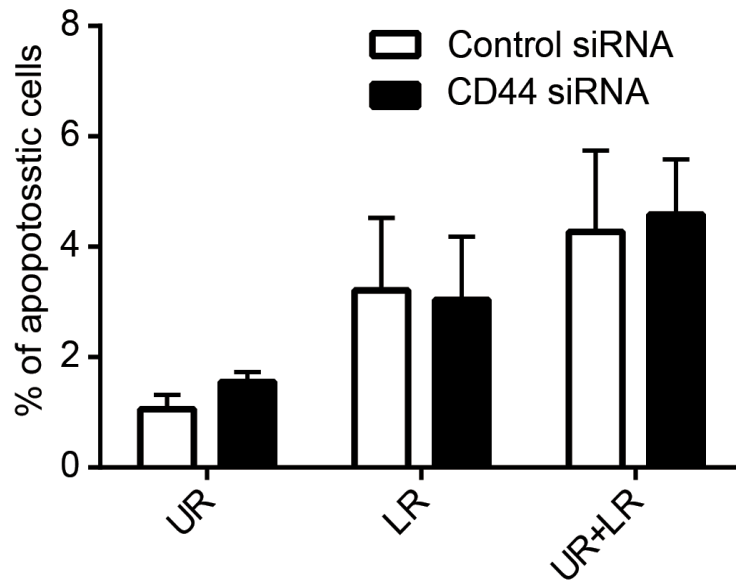

**Figure S3:** CD44 silencing had little effect on MDA-MB-435s cell apoptosis in cell culture with sufficient nutrition.

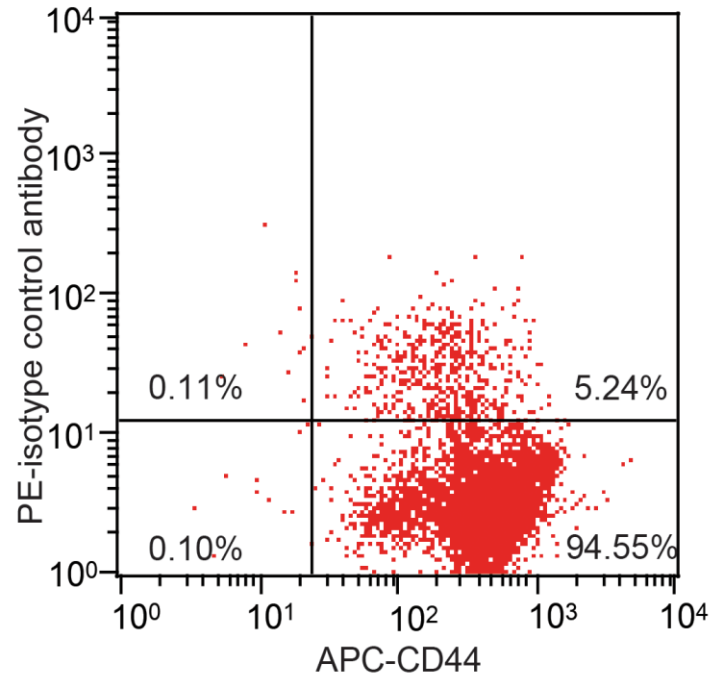

**Figure S4:** Almost all MDA-MB-435s cells are CD44<sup>+</sup>.

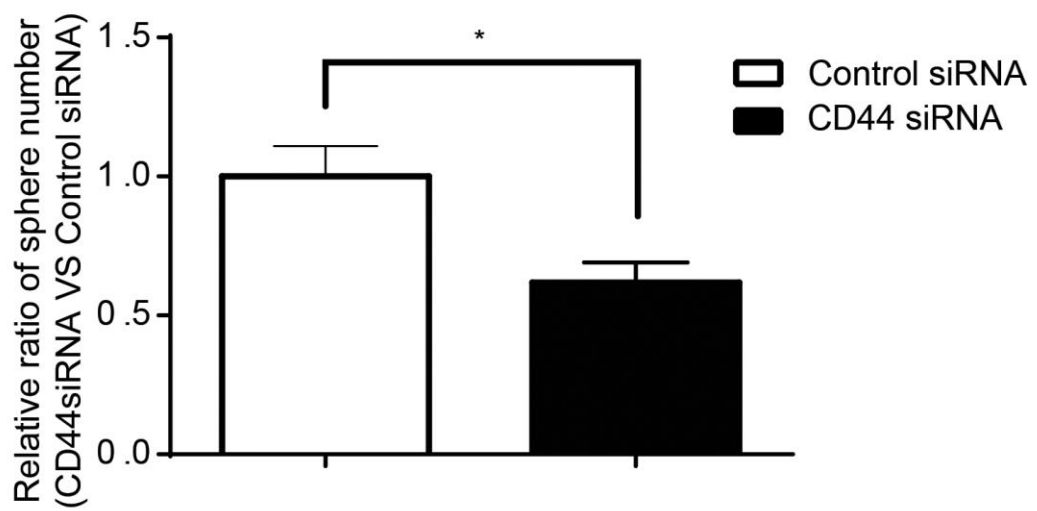

**Figure S5:** Silencing CD44 leads to decrease of tumorsphere number.

**Supplementary Table 1. Real-time RT-PCR primers**

| Real-time RT-PCR primer | Sequence(5'-3')           | Real-time RT-PCR primer | Sequence(5'-3')            |
|-------------------------|---------------------------|-------------------------|----------------------------|
| <i>Gapdh</i> -RT-F      | AGAAGGCTGGGGCTCATTTG      | <i>CD44</i> -RT-F       | GGTACATCTTTTACACCTTTTCTAC  |
| <i>Gapdh</i> -RT-R      | AGGGGCCATCCACAGTCTTC      | <i>CD44</i> -RT-R       | GAATGTGTCTTGGTCTCTGGTAG    |
| <i>Pena</i> -RT-F       | TGGAGAACTTGAAATGGAAA      | <i>Ki67</i> -RT-F       | TCCTTTGGTGGGCACCTAAGACCTG  |
| <i>Pena</i> -RT-R       | GAACTGGTTCATTCATCTCTATGG  | <i>Ki67</i> -RT-R       | TGATGGTTGAGGTCGTTCCCTTGATG |
| <i>Sod2</i> -RT-F       | TCCAAGGGAAACACTCGGCTTT    | <i>Faslg</i> -RT-F      | GCAGCCCTTCAATTACCCAT       |
| <i>Sod2</i> -RT-R       | AAACCACTGGGTGACATCTACCAGA | <i>Faslg</i> -RT-R      | CAGAGGTTGGACAGGGAAGAA      |
| <i>Inhba</i> -RT-F      | GCAGTCTGAAGACCACCCTC      | <i>Cyr61</i> -RT-F      | ACTTCATGGTCCCAGTGCTC       |
| <i>Inhba</i> -RT-R      | ATGATCCAGTCATTCCAGCC      | <i>Cyr61</i> -RT-R      | AAATCCGGGTTTCTTTTACA       |
| <i>Ankrd1</i> -RT-F     | AAGCAGGAGGATCTGAAGACACTT  | <i>Ctgf</i> -RT-F       | TGGAGATTTTGGGAGTACGG       |
| <i>Ankrd1</i> -RT-R     | GTTGTTTCTCGCTTTTCCACTGT   | <i>Ctgf</i> -RT-R       | CAGGCTAGAGAAGCAGAGCC       |
| <i>Akt1</i> -RT-F       | TGAAGGTGCCATCATTCTTG      | <i>CyclinD1</i> -RT-F   | GGCGGATTGGAAATGAACTT       |
| <i>Akt1</i> -RT-R       | ATGAGCGACGTGGCTATTGT      | <i>CyclinD1</i> -RT-R   | TCCTCTCCAAAATGCCAGAG       |
| <i>CyclinE2</i> -RT-F   | GCCAGACTTCTTTTGACATCCT    | <i>Cdk1</i> -RT-F       | TCCCTCCTGGTCAGTACATGG      |
| <i>CyclinE2</i> -RT-R   | TACAAGCTAAGCAGCAGCCC      | <i>Cdk1</i> -RT-R       | ACAAAACACAATCCCCTGTAGG     |
| <i>Nanog</i> -RT-F      | GGTGTGACGCAGAAGGCCTCA     | <i>Sox2</i> - RT-F      | GGGGAAAGTAGTTTGCTGCC       |
| <i>Nanog</i> - RT-R     | CCCAGTCGGGTTACCAGGCA      | <i>Sox2</i> - RT-R      | CGCCGCCGATGATTGTTATT       |
| <i>Occt4</i> - RT-F     | GGCTCGAGAAGGATGTGGTCCG    | <i>KLF4</i> - RT-F      | CGAACCCACACAGGTGAGAA       |
| <i>Occt4</i> - RT-R     | GGGCTCCCATAGCCTGGGGT      | <i>KLF4</i> - RT-R      | GAGCGGGCGAATTTCCAT         |
| <i>Cdkn1a</i> -RT-F     | GGCAGACCAGCATGACAGATT     |                         |                            |
| <i>Cdkn1a</i> -RT-R     | GCGGATTAGGGCTTCTCT        |                         |                            |
